# Supplementary material
Source: publisher figshare collection journal article supplement (https://rs.figshare.com/ndownloader/files/13573964)
Supplement: Supplementary file 1 [file 13573964]

## Sheet: Table S1
Table S1: Primers used for each microsatellite.
Microsatellite	Primer
					Linkage group
A079	F	CGAAGGTTGCGGAGTCCTC			1.1
	R	GTCGTCGGACCGATGCG
A008	F	CGAAGGTAAGGTAAATGGAAC			2.35
	R	GGCGGTTAAAGTTCTGG
Ap043	F	GGCGTGCACAGCTTATTCC			3.36
	R	CGAAGGTGGTTTCAGGCC
A113	F	CTCGAATCGTGGCGTCC			6.21
	R	CCTGTATTTTGCAACCTCGC
A024	F	CACAAGTTCCAACAATGC			7.4
	R	CACATTGAGGATGAGCG
A107	F	CCGTGGGAGGTTTATTGTCG			7.21
	R	CCTTCGTAACGGATGACACC
A088	F	CGAATTAACCGATTTGTCG			8.28
	R	GATCGCAATTATTGAAGGAG
B124	F	CTCGAATCGTGGCGTCC			13.4
	R	CAGGATAGGGTAGGTAAGCAG
The3	F	TAACTGGTCGTCGGTGTT			13.5
	R	CACGTAGAGAATCCCATTGT
A029	F	AAACAGTACATTTGTGACCC			14.1
	R	CAACTTCAACTGAAATCCG
A035	F	GTACACGGTTGCACGGTTG			14.12
	R	CTTCGATGGTCGTTGTACCC
E2		GGCAGAATAAGTGCATTG			MtDNA
H2		CAATATCATTGATGACC			MtDNA
Loci in different linkage groups are more than 50 cM apart even if they are on the same chromosome.
Solignac M., Mougel, F., Vautrin, D., Monnerot, M., Cornuet, J-M 2007. 'A third-generation microsatellite-based linkage map of the honey bee, Apis mellifera, and its comparison with the sequence-based physical map', Genome biology, 8: R66.
Shaibi T., Lattorff H., Moritz R. 2008 A microsatellite DNA toolkit for studying population structure in Apis mellifera. Mol Ecol Res 8, 1034-1036.

## Sheet: Table S2
Table S2: Multilocus genotypes of the 11 examined honeybees in various tissues.
Bee A	Microsatellite	A29			A79			A8			A113			A88			B124			The3
		Allele 1	Allele 2	Allele 3	Allele 1	Allele 2	Allele 3	Allele 1	Allele 2	Allele 3	Allele 1	Allele 2	Allele 3	Allele 1	Allele 2	Allele 3	Allele 1	Allele 2	Allele 3	Allele 1	Allele 2	Allele 3
	Queen allele	132	144		92	123		179	179		217	223		142	151		213	215		200	194
	Tissue (Male or Female)
	Leg (F)	132	144		111	123		179			217			151			213	215		194	200
	Eye (M)	132	144	156	111	123		179			217	223		151			213	215		194	200
	Tongue (M)	132	144		111	123		179			217			151			213	215		194	200
	Sting (F)	132	144		111	123		179			217			151			213	215		194	200
	Tergite 2 patchy	132	144	145	92			165	179		217	223		151			213	215		183	194	200
	Tergite 1 yellow	132	144	145	92			165	179		217			151			213	215		183	194	200
	Tergite 3 mostly black	132	144	145	92			165	179		217	223		151			213	215		183
	Fat body	132	144		92	111		179			217			151			213	215		194	200
	Ovary (F)	132	144					179			217			151			213	215		194	200
	Brain	132	144	156	111			179			217	223		151			213	215		194	200
	Flight muscle	132	144	156	111			179			217			151			213	215		194	200
	Gut	132	144		111			179			217			151			213	215		194	200
	Right antenna (F)	132	144		111			179			217			151			213	215		194	200
		P	M		P	M		P	M		P	M		P	M		P	M		P	M
	Zygote	132/144	144/132		111	123		179	179		223	217		151	151		213/215	215/213		194	200
	Haploid tissue	156			92			165												183
		145
Bee B	Microsatellite	A29			A79			A8			A113			A88			B124			The3
		Allele 1	Allele 2	Allele 3	Allele 1	Allele 2	Allele 3	Allele 1	Allele 2	Allele 3	Allele 1	Allele 2	Allele 3	Allele 1	Allele 2	Allele 3	Allele 1	Allele 2	Allele 3	Allele 1	Allele 2	Allele 3
	Queen allele	132	144		92	123		179	179		217	223		142	151		213	215		200	194
	Tissue (Male or Female)
	Leg (F)	132	145		92	107		165	179		217	223		142	151	154	213	215		183	194	200
	Sting (F)	132	145		92			165	179		217	223		142	151		213	215		183	194
	Tongue (M)	132	145		92	107		165	179		217	223		142	151	154	213	215		183	194	200
	Eye (M)	132	145		107			179			223			154			213			200
	Left antenna (M)				107			179			223			154			213			200
	Right antenna (M)				107			179			223			154			213			200
	Tergite 2 all yellow	132	145		107			179			223			154			213			200
	Tergite 3 patchy mostly black	132	145		92	107		165	179		223			142	151	154	213			183	194	200
	Genitalia (M)	132	145		92			165	179		217	223		142	151		213	215		183	194	200
	Malpighian tubules	132	145		92			165	179		217	223		142	151		213	215		183	194
	Fat body	132	145		92	107		165	179		217	223		142	151	154	213	215		183	194	200
	Genitalia (M)	132	145		92	107		165	179		223			154			213			183	194	200
	Gut	132	145		92			165	179		223			142	151	154	213			183	194	200
	Brain	132	145		92	107		165	179		223			142	151	154	213			183	194	200
	Flight muscle	132	145		92			165	179		217	223		142	151	154	213	215		183	194	200
		P	M		P	M		P	M		P	M		P	M		P	M		P	M
	Zygote	145	132		92	92		165	179		223	217		142/151	142/151		213	215		183	194
	Haploid tissue				107									154						200
Bee C	Microsatellite	A29			A79			A8			A113			A88			B124			The3
		Allele 1	Allele 2	Allele 3	Allele 1	Allele 2	Allele 3	Allele 1	Allele 2	Allele 3	Allele 1	Allele 2	Allele 3	Allele 1	Allele 2	Allele 3	Allele 1	Allele 2	Allele 3	Allele 1	Allele 2	Allele 3
	Queen allele	132	144		92	123		179	179		217	223		142	151		213	215		200	194
	Tissue (Male or Female)
	Leg (F)	132	145		92	123		165			217	223		142	151		213	215		183	194
	Sting (F)	132	145		92			165			217	223		142	151		213	215		183	194
	Tongue (M)	132	145		92	123		165			217	223		142	151		213	215		183	194
	Eye (M)	132	145		92	123		165			217	223		142	151		213	215		183	194
	Antenna (M)	132	145		92			165	179		217	223		142	151		213			183	194
	Brain	132	145	156	92			165	179		217	223		142	151		213	215		183	194
	Nerve ganglia (top)	132	145		92			165	179		217	223		142	151		213	215		183	194
	Nerve ganglia (bottom)	132	145		92			165	179		217	223		142	151		213	215		183
	Right ovary duct (F)	132	145		92			165	179		217	223		142	151		213	215		183	194
	Honey sack (F)	132	145	156	92			165	179		217	223		142	151		213			183	194
	Fat body	132	145		92			165	179		217	223		142	151		213	215		183	194
	Gut	132	145	156	92			165	179		217	223		142	151		213	215		183	194
	Flight muscle	132	145		92			165			217	223		142	151		213	215		183	194
		P	M		P	M		P	M		P	M		P	M		P	M		P	M
	Zygote	145	132		92	123		165	179		223/217	217/223		142/151	151/142		213/215	215/213		183/194	194/183
	Haploid tissue	156			123
Bee D	Microsatellite	A29			A79			A8			A113			A88			B124			The3
		Allele 1	Allele 2	Allele 3	Allele 1	Allele 2	Allele 3	Allele 1	Allele 2	Allele 3	Allele 1	Allele 2	Allele 3	Allele 1	Allele 2	Allele 3	Allele 1	Allele 2	Allele 3	Allele 1	Allele 2	Allele 3
	Queen allele	132	144		92	123		179	179		217	223		142	151		213	215		200	194
	Tissue (Male or Female)
	Leg (M)	134			92			165			217			151			213			183
	Leg (F)	132	144		92			179			217	223		151			213	215		194	200
	Sting (F)	132	144		92			179			217	223		151			213	215		194	200
	Tongue (M)	132	134	144	92			165			217	223		151			213	215		183	194	200
	Eye (M)	134			92			165			217			151			213			183
	Antenna (M)	132	134	144	92			165	179		217	223		151			213	215		183
	Brain	134			92			165			217			151			213			183
	Fat body	132	144		92			179			217	223		151			213			194	200
	Honey sack (F)	132	134	144	92			165	179		217	223		151			213			183	194	200
	Left ovary duct (F)	132	144		92			179			217	223		151			213	215		194	200
	Ovary (F)	132	144		92			179			217	223		151			213	215		194	200
	Gut	132	144		92			179			217			151			213	215		183	194	200
	Flight muscle	132	144		92			165	179		217			151			213	215		183	194	200
		P	M		P	M		P	M		P	M		P	M		P	M		P	M
	Zygote	132/144	144/132		92	92		179	179		217	223		151	151		213	215		194	200
	Haploid tissue	134			111			165												183
Bee E	Microsatellite	A29			A79			A8			A113			A88			B124			The3
		Allele 1	Allele 2	Allele 3	Allele 1	Allele 2	Allele 3	Allele 1	Allele 2	Allele 3	Allele 1	Allele 2	Allele 3	Allele 1	Allele 2	Allele 3	Allele 1	Allele 2	Allele 3	Allele 1	Allele 2	Allele 3
	Queen allele	132	144		92	123		179	179		217	223		142	151		213	215		200	194
	Tissue (Male or Female)
	Leg (F)	132	154	156	92			165			223			142	151		213	221		183	200
	Tongue (M)	132	154	156	92	105		165	179		223			142	151		213	221		183
	Eye (M)	132	154	156	92			165	179		223			142	151		221			183
	Sting (F)	132	156		105			179			223			142	151		213			200
	Antenna (F)
	Brain	132	154	156	92	105		165	179		223			142	151		213	221		183	200
	Left ovary (F)	132	156		105			179			223			142	151		213			200
	Right ovary (F)				105			179			223			142	151		213			200
	Nerve ganglia	132	156		92	105		165	179		223			142	151		213	221		183	200
	Gut	132	156		105			179			223			142	151		213			200
	Fat body	132	156		92	105		179			223			142	151		213			183	200
	Flight muscle	132	154	156	92			165	179		223			142	151		213	221		183	200
		P	M		P	M		P	M		P	M		P	M		P	M		P	M
	Zygote	156	132		105	92		179	179		223	223		142/151	151/142		213	213		200	200
	Haploid tissue	154			123			165									221			183
Bee F	Microsatellite	A29			A79			A8			A113			A88			B124			The3
		Allele 1	Allele 2	Allele 3	Allele 1	Allele 2	Allele 3	Allele 1	Allele 2	Allele 3	Allele 1	Allele 2	Allele 3	Allele 1	Allele 2	Allele 3	Allele 1	Allele 2	Allele 3	Allele 1	Allele 2	Allele 3
	Queen allele	132	144		92	123		179	179		217	223		142	151		213	215		200	194
	Tissue (Male or Female)
	Eye (M)	144	156		92	105		179			217	223		151			213	215		200
	Eye (F)	144	156		92	105		179			217	223		151			213	215		200
	Tongue (M)	144	156		92	105		179			217	223		151			213	215		200
	Leg (F)	144	156		92	105		179			217	223		151			213	215		200
	Sting (F)	144	156		92	105		179			217	223		151			213	215		200
	Antenna (F)	144	156		92	105		179			217	223		151			213	215		200
	Brain	144	156		92	105	107	179			217	223		151			213			200
	Honey sack (F)	144	156		92	105	107	179			217	223		151			213			200
	Ovary (F)	144	156		92	105		179			217	223		151			213			200
	Fat body	144	156		92	105		179			217	223		151			213	215		200
	Gut	144	156		92	105	107	179			217	223		151			213	215		200
	Flight muscle	144	156		92	105	107	179			223			151			213	215		200
		P	M		P	M		P	M		P	M		P	M		P	M		P	M
	Zygote	156	144		105	92		179	179		217/223	223/217		151	151		213/215	215/213		200	200
	Haploid tissue				107						223			142			213
Bee G	Microsatellite	A29			A79			A8			A113			A88			B124			The3
		Allele 1	Allele 2	Allele 3	Allele 1	Allele 2	Allele 3	Allele 1	Allele 2	Allele 3	Allele 1	Allele 2	Allele 3	Allele 1	Allele 2	Allele 3	Allele 1	Allele 2	Allele 3	Allele 1	Allele 2	Allele 3
	Queen allele	132	144		92	123		179	179		217	223		142	151		213	215		200	194
	Tissue (Male or Female)
	Leg (F)	132			92			165	179		223			151			215	217		192	194
	Sting	132			92			165	179		223			151			215	217		192	194
	Tongue (M)	132	149		92			165	179		223			142	151		215	217		192	194
	Eye (M)	132	149		92			165	173	179	223			142	151		213	215	217	192	194
	Right antenna (M)	149			92			173			223			142			213			192
	Left antenna (F)	132			92			165	179		223			151			215			192	194
	Brain	132	149		92			165	173	179	223			142	151		215	217		192	194
	Right ovary (F)	132			92			165	179					151
	Left ovary (F)	132			92			165	179		223			151			215	217		192	194
	Honey sack (F)	132	149		92			165	173	179	223			142	151		213	215		192	194
	Gut	132			92			165			223			151			215	217		192	194
	Fat body	132			92			165	179		223			151			215	217		192	194
	Flight muscle	132			92			165	179		223			151			215			192	194
		P	M		P	M		P	M		P	M		P	M		P	M		P	M
	Zygote	132	132		92	92		165	179		223	223		151	151		217	215		192	194
	Haploid tissue	149			123			173						142			213
Bee H	Microsatellite	A29			A79			A8			A113			A88			B124			The3
		Allele 1	Allele 2	Allele 3	Allele 1	Allele 2	Allele 3	Allele 1	Allele 2	Allele 3	Allele 1	Allele 2	Allele 3	Allele 1	Allele 2	Allele 3	Allele 1	Allele 2	Allele 3	Allele 1	Allele 2	Allele 3
	Queen allele	132	144		92	123		179	179		217	223		142	151		213	215		200	194
	Tissue (Male or Female)
	Tongue (F)	149			92			165	173	179	223			142			213			192
	Leg (F)	132	154		92			165	179		223			142			215	221
	Sting (F)	132	154		92			165	179		223			142			215	221		183	200
	Right eye (M)	132	149	154	92			165	173	179	223			142			213	215	221	183	192	200
	Left Eye (M)	132	149	154	92			165	173	179	223			142			213	215	221	183	192	200
	Left antenna (M)	132	149	154	92			165	173	179	223			142			213	215		183	192	200
	Brain	132	149	154	92			165	173	179	223			142			213			183	192	200
	Right ovary (F)	132	149	154	92			165	173	179	223			142			213	215		183	192	200
	Honey sack (F)	132	154		92			165	179		223			142			215	221		183	200
	Gut	132	154		92			165	179		223			142			215	221		183	200
	Fat body	132	154		92			165	179		223			142			215	221		183	200
	Flight muscle	132	154		92			165	179		223			142			215	221		183	192	200
	Right antenna (M)										223			142			213			192
		P	M		P	M		P	M		P	M		P	M		P	M		P	M
	Zygote	154	132		92	92		165	179		223	223		142	142		221	215		183	200
	Haploid tissue	149			123			173									213			192
Bee I	Microsatellite	A29			A79			A8			A113			A88			B124			The3
		Allele 1	Allele 2	Allele 3	Allele 1	Allele 2	Allele 3	Allele 1	Allele 2	Allele 3	Allele 1	Allele 2	Allele 3	Allele 1	Allele 2	Allele 3	Allele 1	Allele 2	Allele 3	Allele 1	Allele 2	Allele 3
	Queen allele	132	144		92	123		179	179		217	223		142	151		213	215		200	194
	Tissue (Male or Female)
	Tongue (F)	144	154	156	92	105		165	179		223			142	151		213	215	221	183	194	200
	Right leg (F)	144	154		92			165	179		223			142			215	221		183	194
	Left leg (F)	144	154		92			165	179		223			142			215	221		183	194
	Right eye (M)	156			92	105		179			223			151			213	221		183	200
	Left eye (M)	156			92	105		179			223			151			213	221		183	200
	Left eye fragment (F)	144	154	156	92	105		165	179		223			142	151		213	221		183	194	200
	Sting (F)	144	154		92			165	179		223			142			215	221		183	194
	Right antenna (F)	156			92	105		165	179		223			142	151		213	221		183	200
	Brain	144	154	156	92			165	179		223			142	151		215	221		183	194	200
	Honey sack (F)	144	154		92			165			223			142			215	221		183	194
	Left ovary (F)	144	154		92			165	179		223			142			215	221		183	194
	Right ovary (F)	144	154		92			165	179		223			142			215	221		183	194
	Gut	144	154		92			165	179		223			142			215	221		183	194
	Fat body	144	154		92			165	179		223			142			215	221		183	194
	Flight muscle	144	154		92			165	179		223			142			215	221		183	194
	Left antenna (F)										223			151			213			200
		P	M		P	M		P	M		P	M		P	M		P	M		P	M
	Zygote	154	144		92	92		165	179		223	223		142	142		221	215		183	194
	Haploid tissue	156			105			179						151			213			200
Bee J	Microsatellite	A29		A79		A8		A113		A88		B124		The3
		Allele 1	Allele 2	Allele 1	Allele 2	Allele 1	Allele 2	Allele 1	Allele 2	Allele 1	Allele 2	Allele 1	Allele 2	Allele 1	Allele 2
	Queen allele	132	144	92	123	179	179	217	223	142	151	213	215	200	194
	Tissue (Male or Female)
	Tongue (M)	132	134	92		179		217		142		215	226	183	194
	Leg (F)	132	134	92		179		217		142		215	226	183	194
	Eye (M)	132	134	92		179		217		142		215	226	183	194
	Genitalia (M)	132	134	92		179		217		142		215	226	183	194
	Antenna	132	134	92		179		217		142		215	226	183	194
	Brain	132	134	92		179		217		142		215	226	183	194
	Malpighian tubules	132	134	92		179		217		142		215	226	183	194
	Gut	132	134	92		179		217		142		215	226	183	194
	Fat body	132	134	92		179		217		142		215	226	183	194
	Low gut	132	134	92		179		217		142		215	226	183	194
	Leg (F)	132	134	92		179		217		142		215	226	183	194
	Flight muscle	132	134	92		179		217		142		215	226	183	194
		P	M	P	M	P	M	P	M	P	M	P	M	P	M
	Zygote	134	132	92	92	179	179	217	217	142	142	226	215	183	194
	Haploid tissue
Bee K	Microsatellite	A29		A79		A8		A113		B124		A88		The3
		Allele 1	Allele 2	Allele 1	Allele 2	Allele 1	Allele 2	Allele 1	Allele 2	Allele 1	Allele 2	Allele 1	Allele 2	Allele 1	Allele 2
	Queen allele	132	144	92	123	179	179	217	223	213	215	142	151	200	194
	Tissue (Male or Female)
	Tongue (F)	151		107	111	165		217	233	213	215	151		192	200
	Antenna (F)	151		107		165		217	233	213	215	151		192	200
	Eye (F)	151		107	111	165		217	233	213		151		192	200
	Brain	151		107		165		217	233	213	215	151		192	200
	Leg (F)	151		107	111	165		217		215		151		192	200
	Honey sack (F)	151		107	111	165		217		215		151		192	200
	Left ovary (F)	151		107	111	165		217		213	215	151		192	200
	Nerve ganglia	151		107	111	165		217		213	215	151		192	200
	Fat body	151		107	111	165		217		213	215	151		192	200
	Malpighian tubules	151		107		165		217	233	213	215	151		192	200
	Gut	151		107	111	165		217		215		151		192	200
	Sting (F)	151		107	111	165		217		213	215	151		192	200
	Flight muscle	151		107		165		217		213	215	151		192	200
		P	M	P	M	P	M	P	M	P	M	P	M	P	M
	Zygote	151		107/111		165		217/233	217/233	213/215	213/215	151	151	192	200
	Haploid tissue

## Sheet: Table S3
Table S3: Multilocus genotypes of zygotic (female diploid) and androgenic (haploid male tissue) in the 11 examined bees. P, paternal allele; M, maternal allele.
		A29		A79		A8		A113		A88		B124		The3
	Queen allele	132	144	92	123	179	179	217	223	142	151	213	215	200	194
		A29		A79		A8		A113		A88		B124		The3
Bee A		P	M	P	M	P	M	P	M	P	M	P	M	P	M
	Zygotic	132	144	111	92	179	179	217	217	151	151	213	215	194	200
	Haploid	156		123		165		223		151		213		183
		145		92
	Patriline
	P18	132		111		179		217		151		213		194
	P31	145		92		165		223		151		213		183
	P42	156		123		165		223		151		213		194/183
		A29		A79		A8		A113		A88		B124		The3
Bee B		P	M	P	M	P	M	P	M	P	M	P	M	P	M
	Zygotic	145	132	92	92	165	179	223	217	151	142	213	215	183	194
	Haploid	132		107		179		223		154		213		200
	Patriline
	P31	145		92		165		223		151		213		183
	P17	132		107		179		223		154		213		200
		A29		A79		A8		A113		A88		B124		The3
Bee C		P	M	P	M	P	M	P	M	P	M	P	M	P	M
	Zygotic	145	132	92	92	165	179	223	217	151	142	213	215	183	194
	Haploid	156		123		165		223		151		213		194/183
	Patriline
	P31	145		92		165		223		151		213		183
	P42	156		123		165		223		151		213		194/183
		A29		A79		A8		A113		A88		B124		The3
Bee D		P	M	P	M	P	M	P	M	P	M	P	M	P	M
	Zygotic	132/144	144/132	92	92	179	179	217	223	151	151	213	215	194/200	200/194
	Haploid	134		92		165		217		151		213		183
	Patriline
	P46	132/144		92		179		217		151		213		194/200
	P19	134		92		165		217		151		213		183
		A29		A79		A8		A113		A88		B124		The3
Bee E		P	M	P	M	P	M	P	M	P	M	P	M	P	M
	Zygotic	156	132	105	92	179	179	223	223	151	142	213	213	200	200
	Haploid	154		92		165		223		142		221		183
	Patriline
	P41	156		105		179		223		151		213		200
	P35	154		92		165		217/223		142		221		183
		A29		A79		A8		A113		A88		B124		The3
Bee F		P	M	P	M	P	M	P	M	P	M	P	M	P	M
	Zygotic	156	144	105	92	179	179	223	217	151	151	213	215	200	200
	Haploid	144		107		179		223		151		213		200
	Patriline
	P41	156		105		179		223		151		213		200
	P29	144		107		179		223		151		213		200
		A29		A79		A8		A113		A88		B124		The3
Bee G		P	M	P	M	P	M	P	M	P	M	P	M	P	M
	Zygotic	132	132	92	92	165	179	223	223	151	151	217	215	192	194
	Haploid	149		92		173		223		142		213		192
	Patriline
	P2	132		92		165		223		151		217		192
	P38	149		92		173		223		142		213/215		192
		A29		A79		A8		A113		A88		B124		The3
Bee H		P	M	P	M	P	M	P	M	P	M	P	M	P	M
	Zygotic	154	132	92	92	165	179	223	223	142	142	221	215	183	200
	Haploid	149		92		173		223		142		213		192
	Patriline
	P35	154		92		165		223/217		142		221		183
	P38	149		92		173		223		142		213/215		192
		A29		A79		A8		A113		A88		B124		The3
Bee I		P	M	P	M	P	M	P	M	P	M	P	M	P	M
	Zygotic	154	144	92	92	165	179	223	223	142	142	221	215	183	194
	Haploid	156		105		179		223		151		213		200
	Patriline
	P35	154		92		165		223/217		142		221		183
	P41	156		105		179		223		151		213		200
		A29		A79		A8		A113		A88		B124		The3
Bee J		P	M	P	M	P	M	P	M	P	M	P	M	P	M
	Zygotic	134	132	92	92	179	179	217	217	142	142	226	215	183	194
	Haploid	N/A		N/A		N/A		N/A		N/A		N/A		N/A
	Patriline
	Patriline43	134		92		179		217		142		226		183
		A29		A79		A8		A113		A88		B124		The3
Bee K		P	M	P	M	P	M	P	M	P	M	P	M	P	M
	Zygotic	151	N/A	107/111	N/A	165	N/A	217/233	N/A	151	N/A	213/215	N/A	192/200	N/A
	Haploid	N/A				N/A		N/A		N/A		N/A		N/A
	Patriline
	P44	151		107/111		165		217/233		151		213/215		192/200
	P45	151		111/107		165		233/217		151		215/213		200/192

## Sheet: Table S5
Table S5: Extra microsatellite genotyping for Bee K in various tissues. P, paternal allele; M, maternal allele.
Bee K	Microsatellite	A107		A35		A24		Ap43
		Allele 1	Allele 2	Allele 1	Allele 2	Allele 1	Allele 2	Allele 1	Allele 2
	Queen allele	188	192	109	110	107	107	144	144
	Tissue (Male or Female)
	Tongue (F)	175	190	109	114	107		134	148
	Antenna (F)	175	190	109	114	107		134	148
	Eye (F)	175	190	109	114	107		134	148
	Brain			109	114	107		134	148
	Leg (F)	175	190	109	114	107		134	148
	Honey sack (F)	175	190	109	114	107		134	148
	Left ovary (F)	175	190	109	114	107		134	148
	Nerve ganglia	175	190	109	114	107		134	148
	Fat body	175	190	109	114	107		134	148
	Malpighian tubules	175	190	109	114	107		134	148
	Gut	175	190	109	114	107		134	148
	Sting (F)	175	190	109	114	107		134	148
	Flight muscle	175	190	109	114	107		134	148
		P	M	P	M	P	M	P	M
	Zygote	175/190		114/109		107		134/148
	Haploid tissue

## Sheet: Table S6
Table S6: Multilocus genotypes for each patriline and number of individuals for 'normal' worker bees (Yagound et al. 2017) and the 11 honeybees in this study.
	Microsatellite locus							Count
Yagound et al. (2017) study patrilines	A29	A79	A8	A113	A88	B124	The3	Workers from colony	Bees in this study
P1	132	92	165	217/223	142/151	213	192	1	0
P2	132	92	165	223	151	217	192	17	1
P3	132	92	179	223	151	217	183	4	0
P4	132	92	179	223	151	217	192	5	0
P5	132	92		223	142	221		1	0
P6	132	92		233	142	213	183	1	0
P7	132	101	179	217/223	142/149	213	200	1	0
P8	132	105	165	223	142	213	194/200	1	0
P9	132	105	165	223	151	213/215	183	2	0
P10	132	105	179	223	142	213	194	2	0
P11	132	105	179	223	142	213	200	33	0
P12	132	105	179	223	151	213	194	1	0
P13	132	105	179	223	151	213	200	8	0
P14	132	105	179	229	142	213	194	21	0
P15	132	107	179	223	151	213		1	0
P16	132	107	179	217/223	152	213/215	200	1	0
P17	132	107	179	223	154	213	200	8	1
P18	132	111	179	217	151	213	194	12	1
P19	134	92	165	217	151	213	183	12	1
P20	134	92	179	217/223	142	213	183	2	0
P21	134	92	179	217	142	215		2	0
P22	134	107	165	217/223	142/149	213/215	183	1	0
P23	135	92	165	217	142/149	213		3	0
P24	135	92	179	217/223	142	213	183	1	0
P25	144	92	165	223	142	221	183	3	0
P26	144	105	179	223	142	213	200	31	0
P27	144	105	179	223	151	213	200	16	0
P28	144	107	179	223	142	153	200	1	0
P29	144	107	179	223	151	213	194/200	2	1
P30	144	107	179	223	154	213	200	3	0
P31	145	92	165	223	151	213	183	27	3
P32	145	92/123	179	217/223	151	213/215	183	1	0
P33	149	92	171	223	142	213	192	9	0
P34	149	92	179	217	151	213	192	3	0
P35	154	92	165	223	142	221	183	8	3
P36	154	92	165	217/223	142	215	183	1	0
P37	154	92	165	217/223	142	213		1	0
P38	149	92	173	217/223	142	213/215	192	1	2
P39	134	105	171	233	142/151	213	183	1	0
P40	132	105	179	217/223	154	213	194/200	1	0
	Microsatellite locus							Count
New patrilines in this study	A29	A79	A8	A113	A88	B124	The3	Workers from colony	Bees in this study
P41	156	105	179	223	151	213	200	0	2
P42	156	123/92	165	223	151	213	194/183	0	2
P43	134	92	179	217	142	226	183	0	1
P44	151	107/111	165	217/233	151	213/215	192/200	0	1
P45	151	111/107	165	233/217	151	215/213	200/192	0	1
P46	132/144	92	179	217	151	213	194/200	0	1
